# Supplementary material for: An Integrated Approach for the Environmental Characterization of a Coastal Area in the Southern Atacama Desert
Source: MDPI journal article supplement (doi:10.3390/app13116360), 2023-05-23
Supplement: s1 [file s1]

# Supplementary Materials

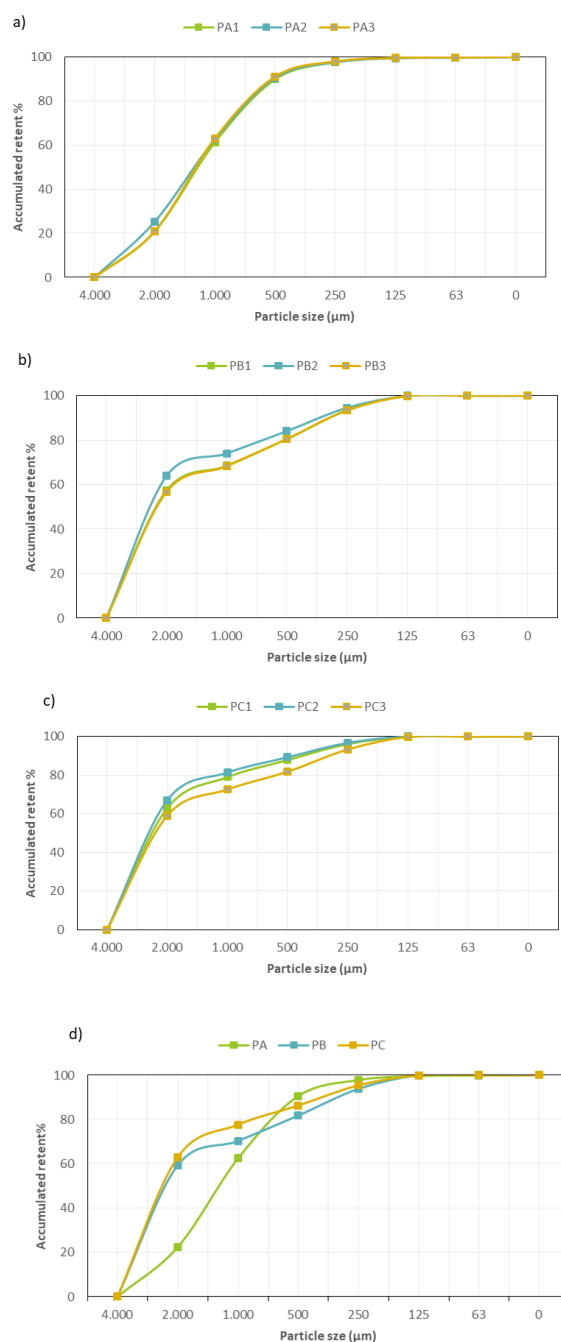

**Figure S1.** Granulometry results from accumulated retention per particle size for samples from (a) PA, (b) PB, (c) PC, (d) total.

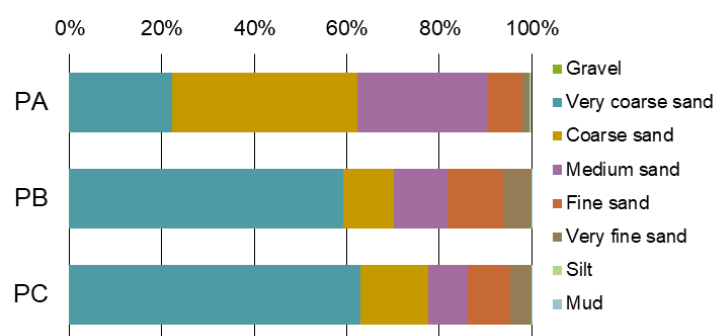

**Figure S2.** Grain-size sediment distribution of collected sediments samples (PA, PB, PC,  $n=3$ ).

**Table S1.** Detection limit (DL) and quantification limit (QL) for water, sediment and algal samples from the current study.

| Element | Unit | Water     |         | Sediment/ Algae |      |
|---------|------|-----------|---------|-----------------|------|
|         |      | DL        | QL      | DL              | QL   |
| Cu      | mg/L | 0.0002    | 0.0005  | 0.175           | 1.75 |
| Fe      | mg/L | 0.002     | 0.006   | 14              | 140  |
| Al      | mg/L | 0.002     | 0.01    | 14              | 140  |
| As      | mg/L | 0.001     | 0.0003  | 0.1             | 1    |
| Ag      | mg/L | 0.000006  | 0.00002 | 0.06            | 0.6  |
| Pb      | mg/L | 0.00010   | 0.0004  | 0.1             | 1    |
| Bi      | mg/L | 0.000005  | 0.00002 | 0.1             | 1    |
| Cd      | mg/L | 0.0000006 | 0.00002 | 0.09            | 0.9  |
| Mn      | mg/L | 0.00005   | 0.0001  | 1.3             | 13   |
| Zn      | mg/L | 0.0002    | 0.0007  | 0.12            | 1.2  |
| Ca      | mg/L | 0.02      | 0.06    | 2.5             | 25   |
| K       | mg/L | 0.003     | 0.009   | 1.5             | 15   |
| Mg      | mg/L | 0.002     | 0.005   | 1.3             | 13   |
| Na      | mg/L | 0.003     | 0.01    | 1.5             | 15   |
| Li      | mg/L | 0.0001    | 0       | 0.15            | 1.5  |
